# Supplementary material
Source: publisher site journal article supplement (https://www.dovepress.com/get_supplementary_file.php?f=229904.docx)
Supplement: Supplementary file 1 [file get_supplementary_file.php]

**SUPPLEMENTARY INFORMATION**

**High suPAR and low blood eosinophil count are risk factors for hospital admission and mortality in patients with COPD**

**Kjell E. J. Håkansson1, Charlotte S. Ulrik1,2, Nina S. Godtfredsen1,2, Thomas Kallemose3, Ove Andersen2,3,4, Jesper Eugen-Olsen3, Kristoffer Marsaa5, Line J. H. Rasmussen3,6**

1Department of Respiratory Medicine, Copenhagen University Hospital Amager and Hvidovre, Hvidovre, Denmark

2Institute of Clinical Medicine, University of Copenhagen, Copenhagen, Denmark

3Clinical Research Centre, Copenhagen University Hospital Amager and Hvidovre, Hvidovre, Denmark

4Emergency Department, Copenhagen University Hospital Amager and Hvidovre, Hvidovre, Denmark

5Palliative Unit, Copenhagen University Hospital Herlev and Gentofte, Herlev, Denmark

6Department of Psychology and Neuroscience, Duke University, Durham, NC, USA

**Figure S1***- AUC-graph for suPAR and blood eosinophil count-based 365-day Readmission Prediction*


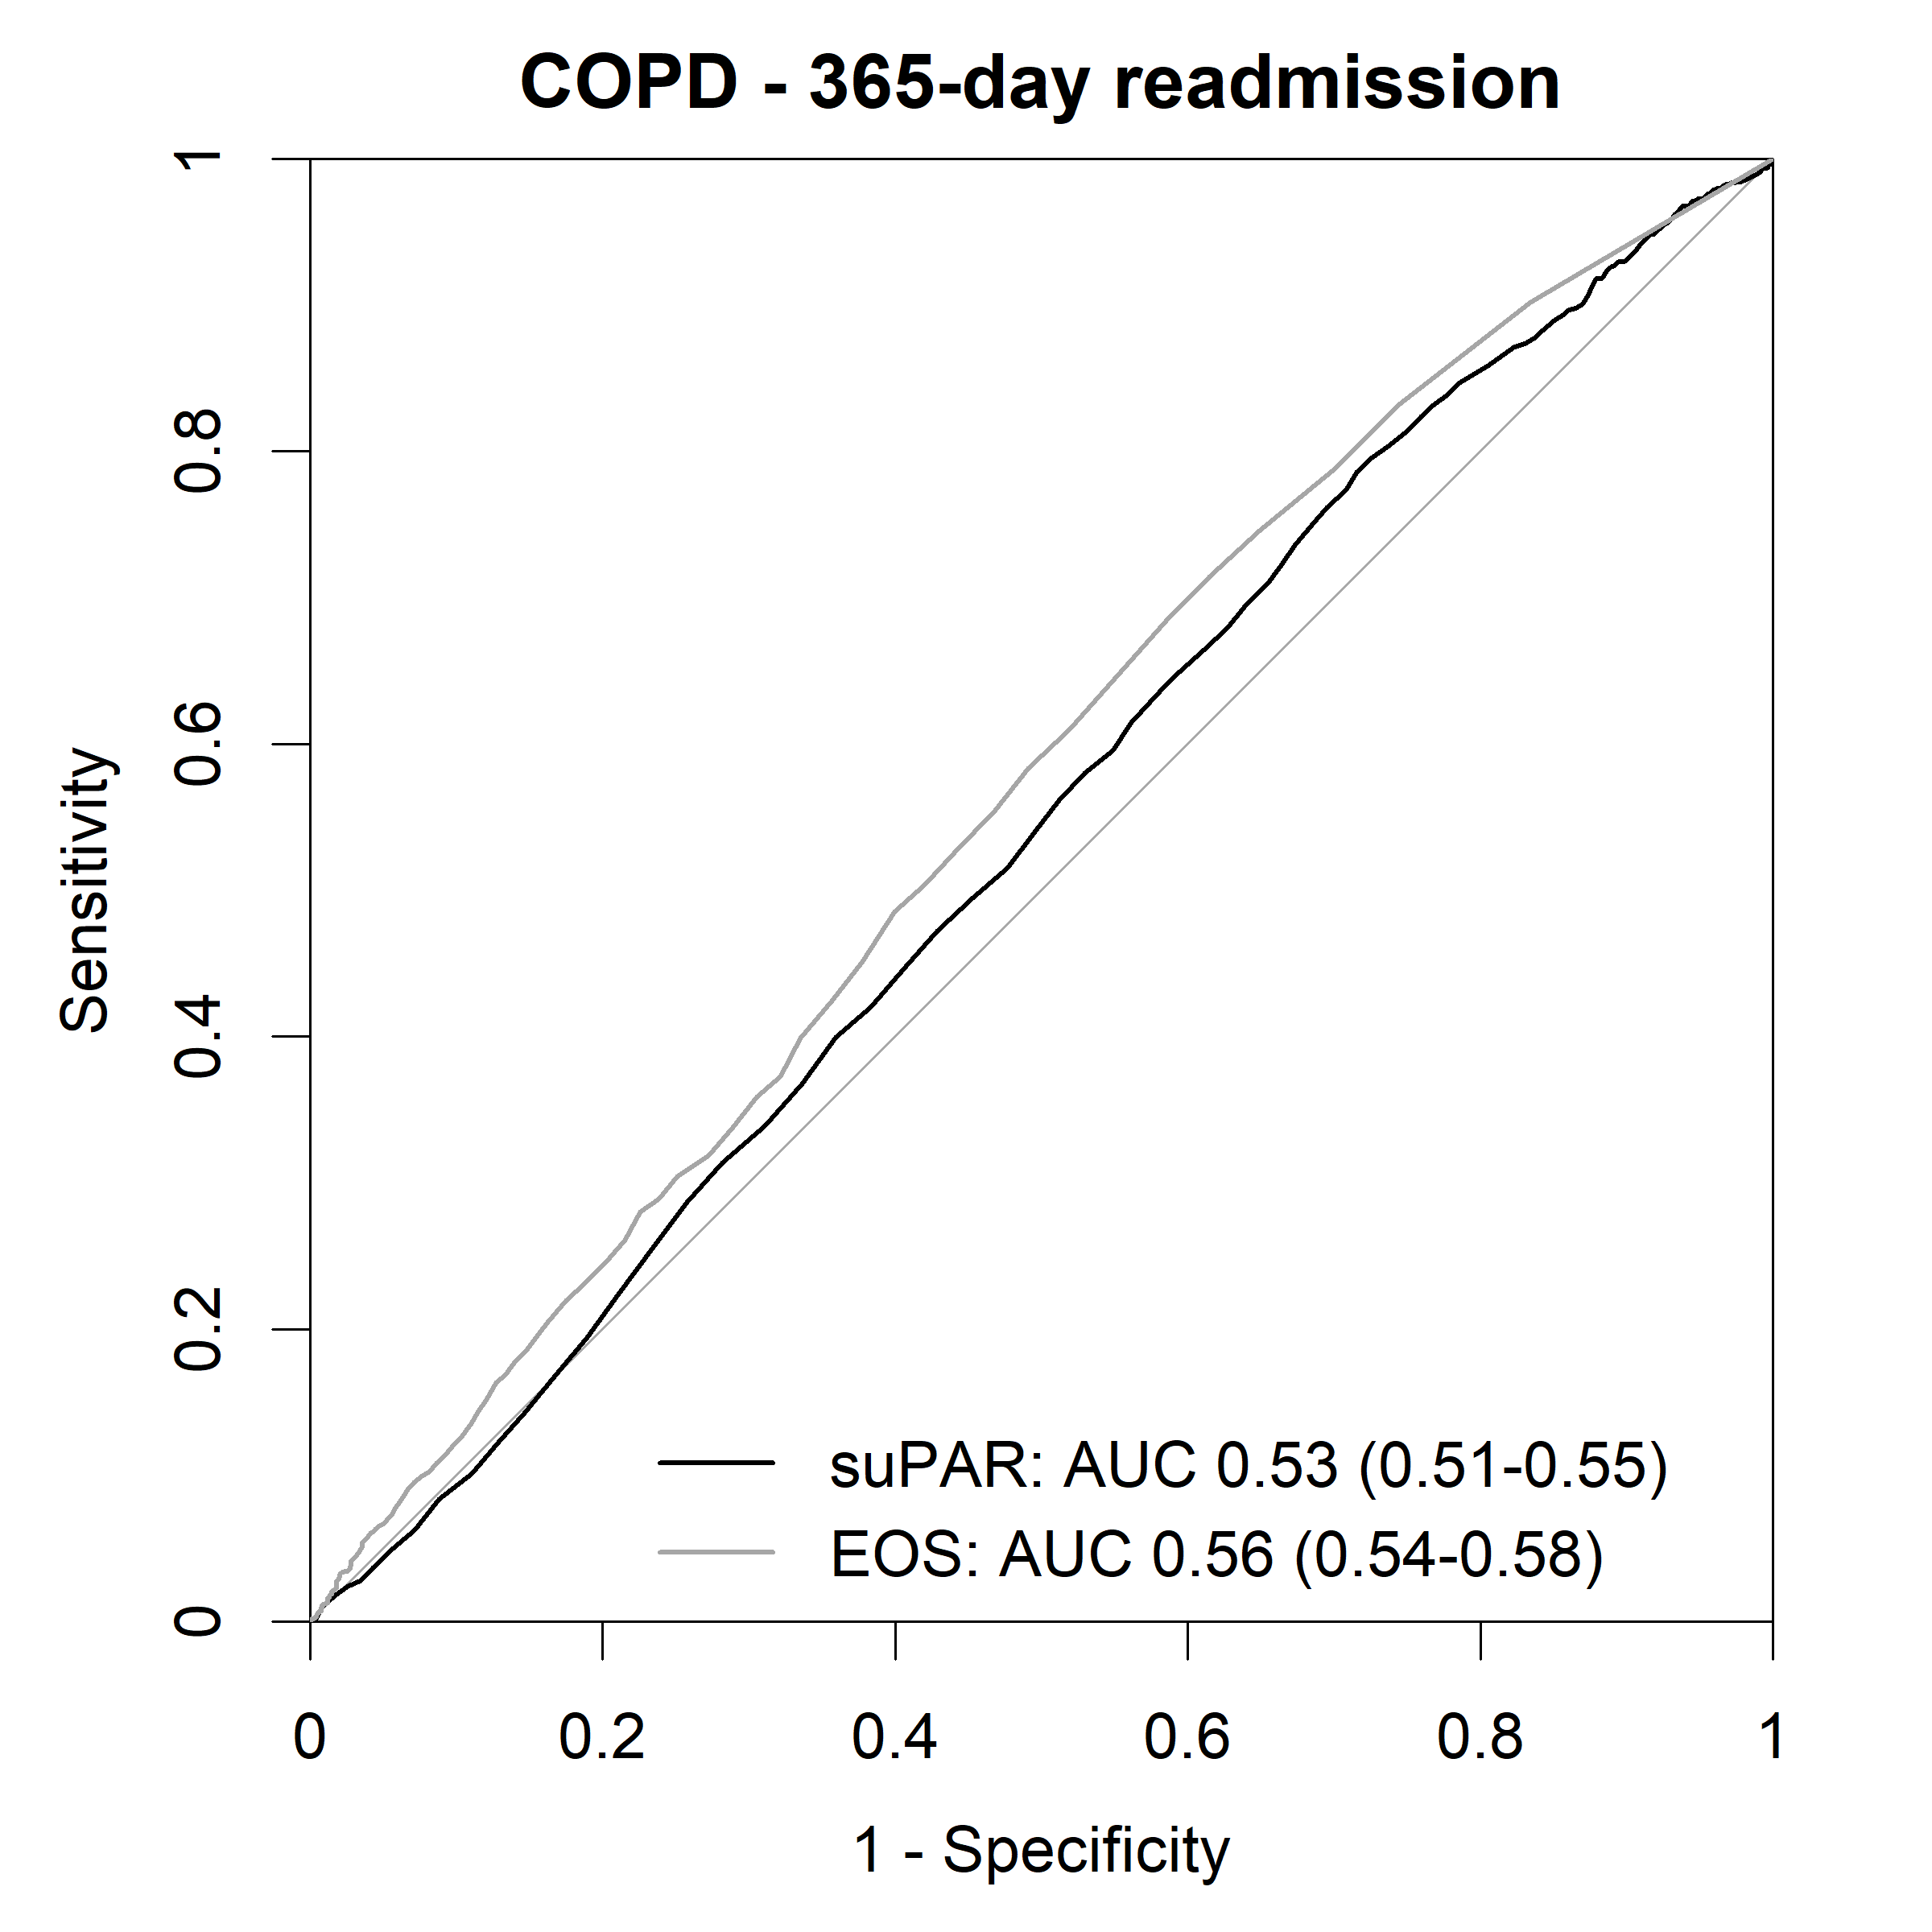


Receiver Operating Characteristic-analysis of suPAR and blood eosinophil count for 365-day readmission prediction in 4,022 patients acutely hospitalized with chronic obstructive pulmonary disease.

**Figure S2***- AUC-graph for suPAR and blood eosinophil count-based 365-day Mortality Prediction*


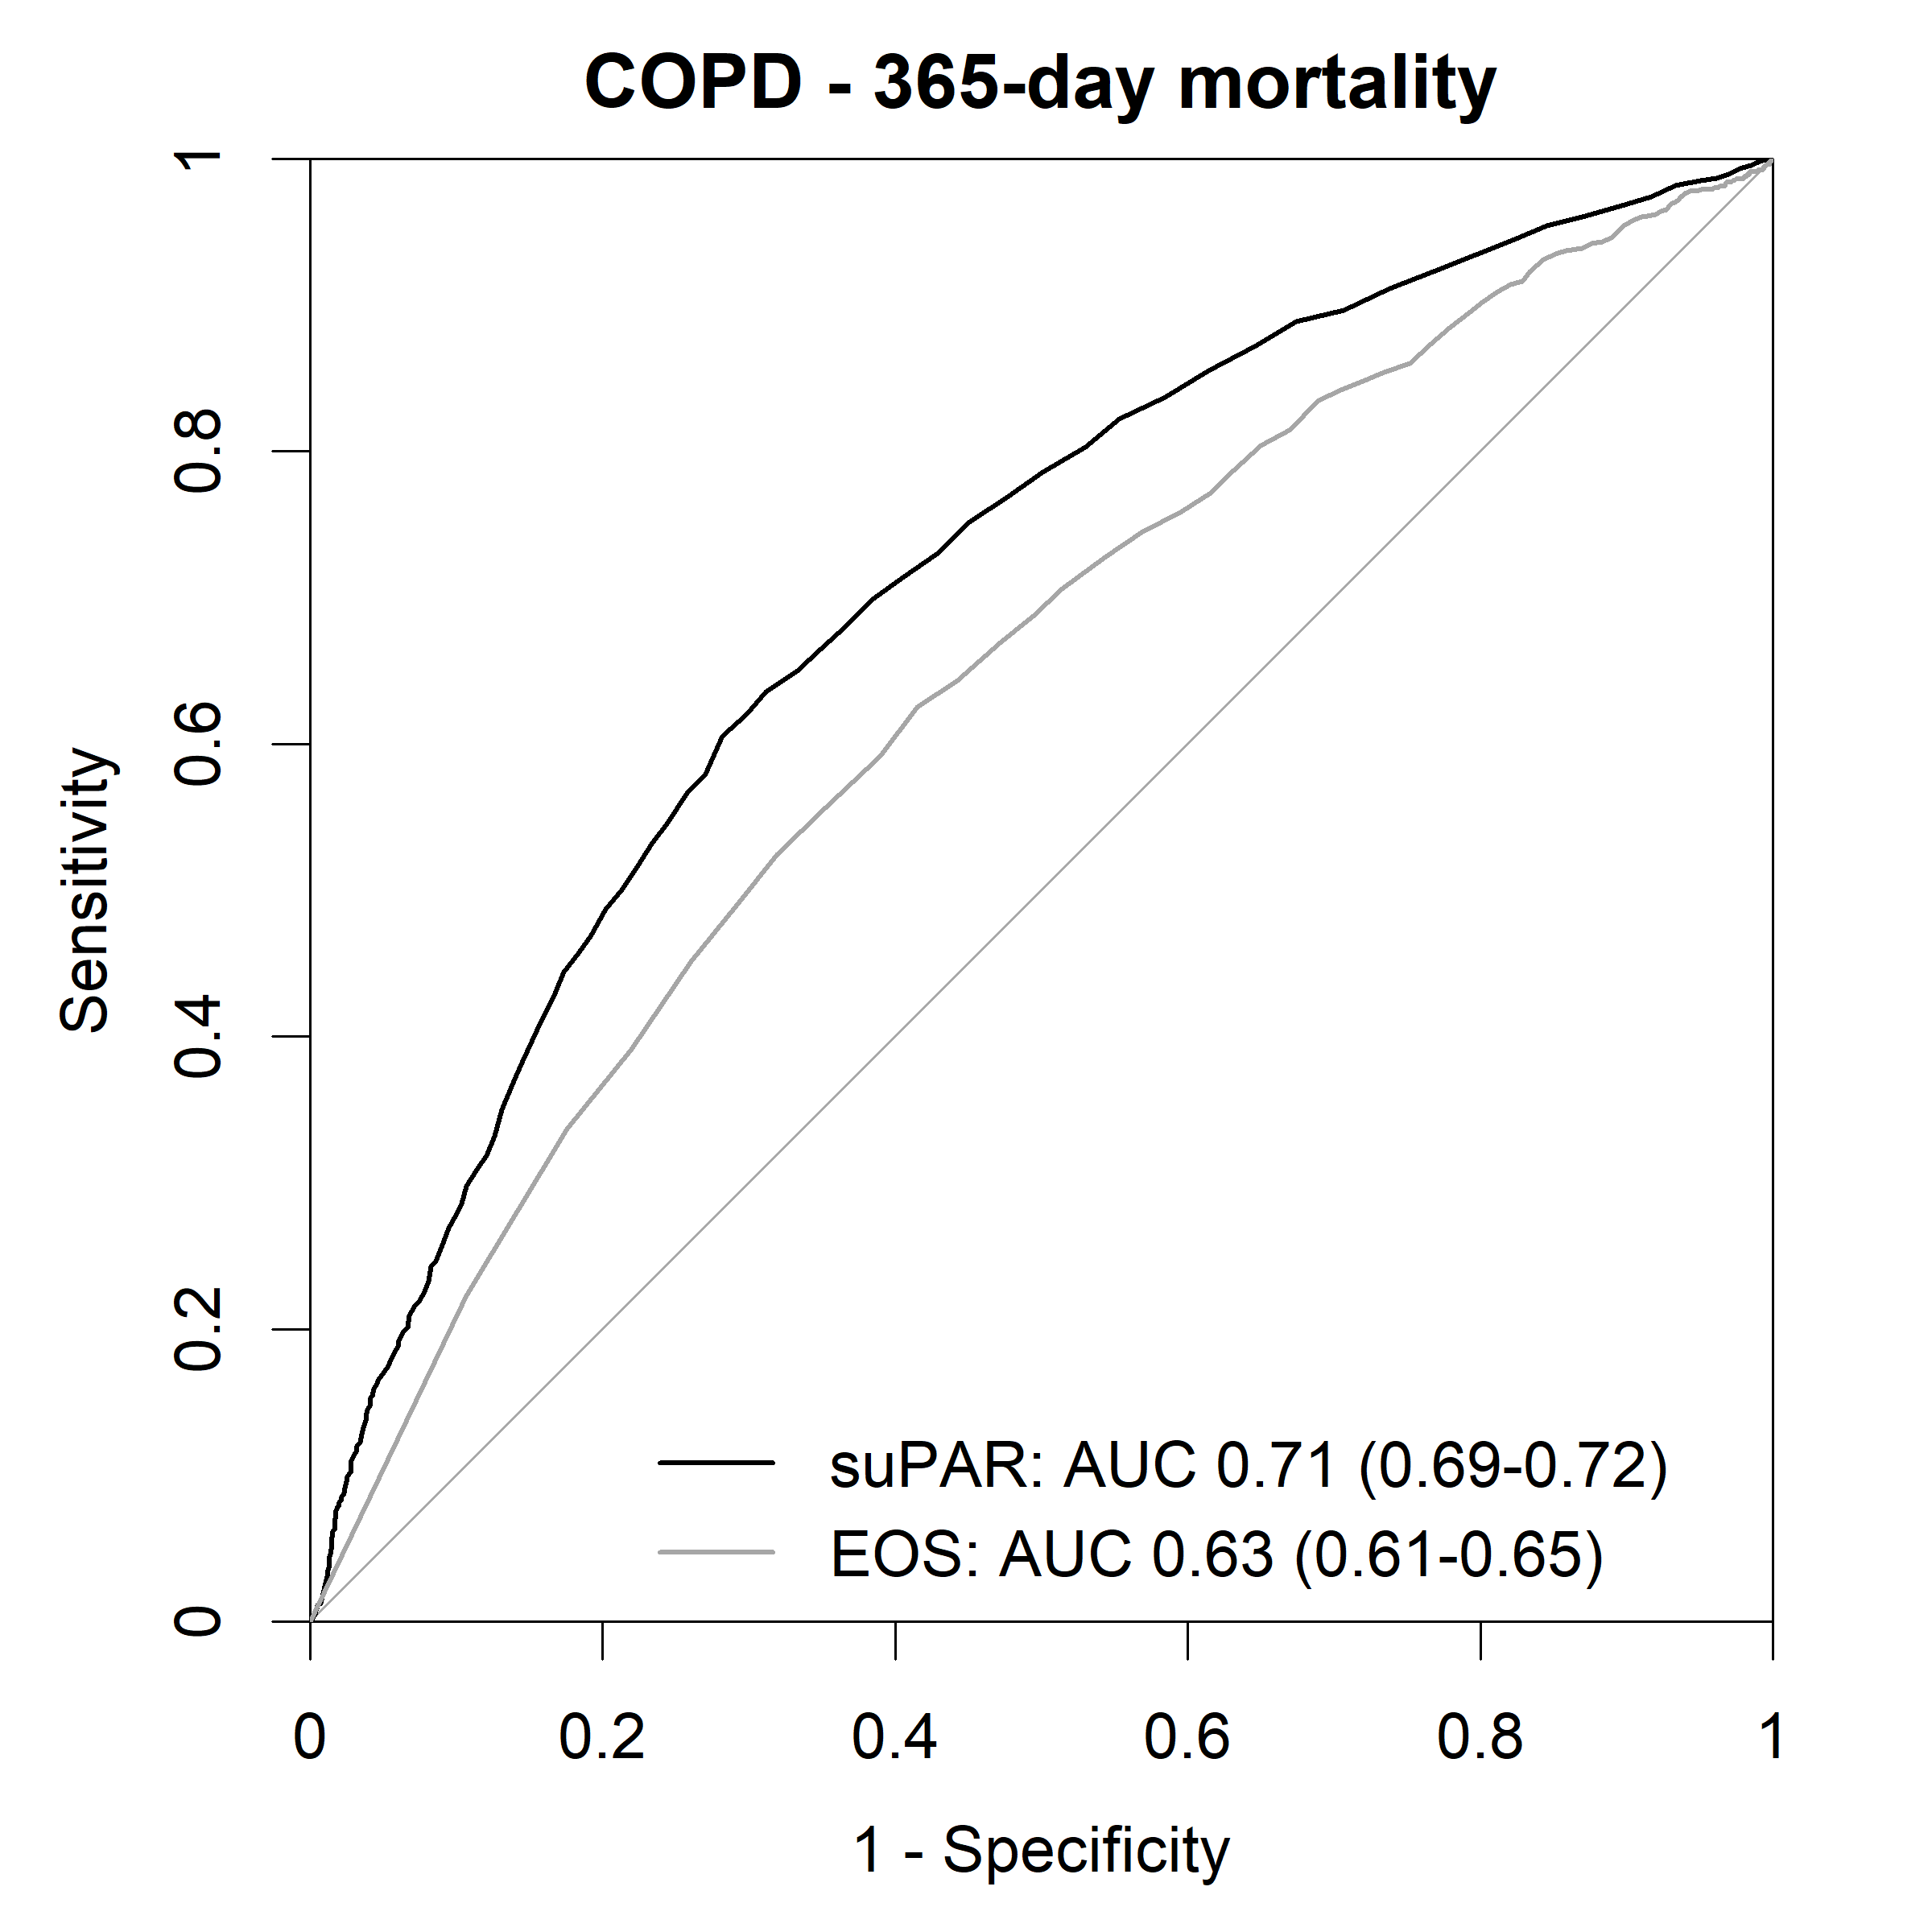


Receiver Operating Characteristic-analysis of suPAR and blood eosinophil count for 365-day mortality prediction in 4,022 patients acutely hospitalized with chronic obstructive pulmonary disease.

**Figure S3***- Cumulative incidence graph of readmission and mortality, stratified by blood eosinophils.*


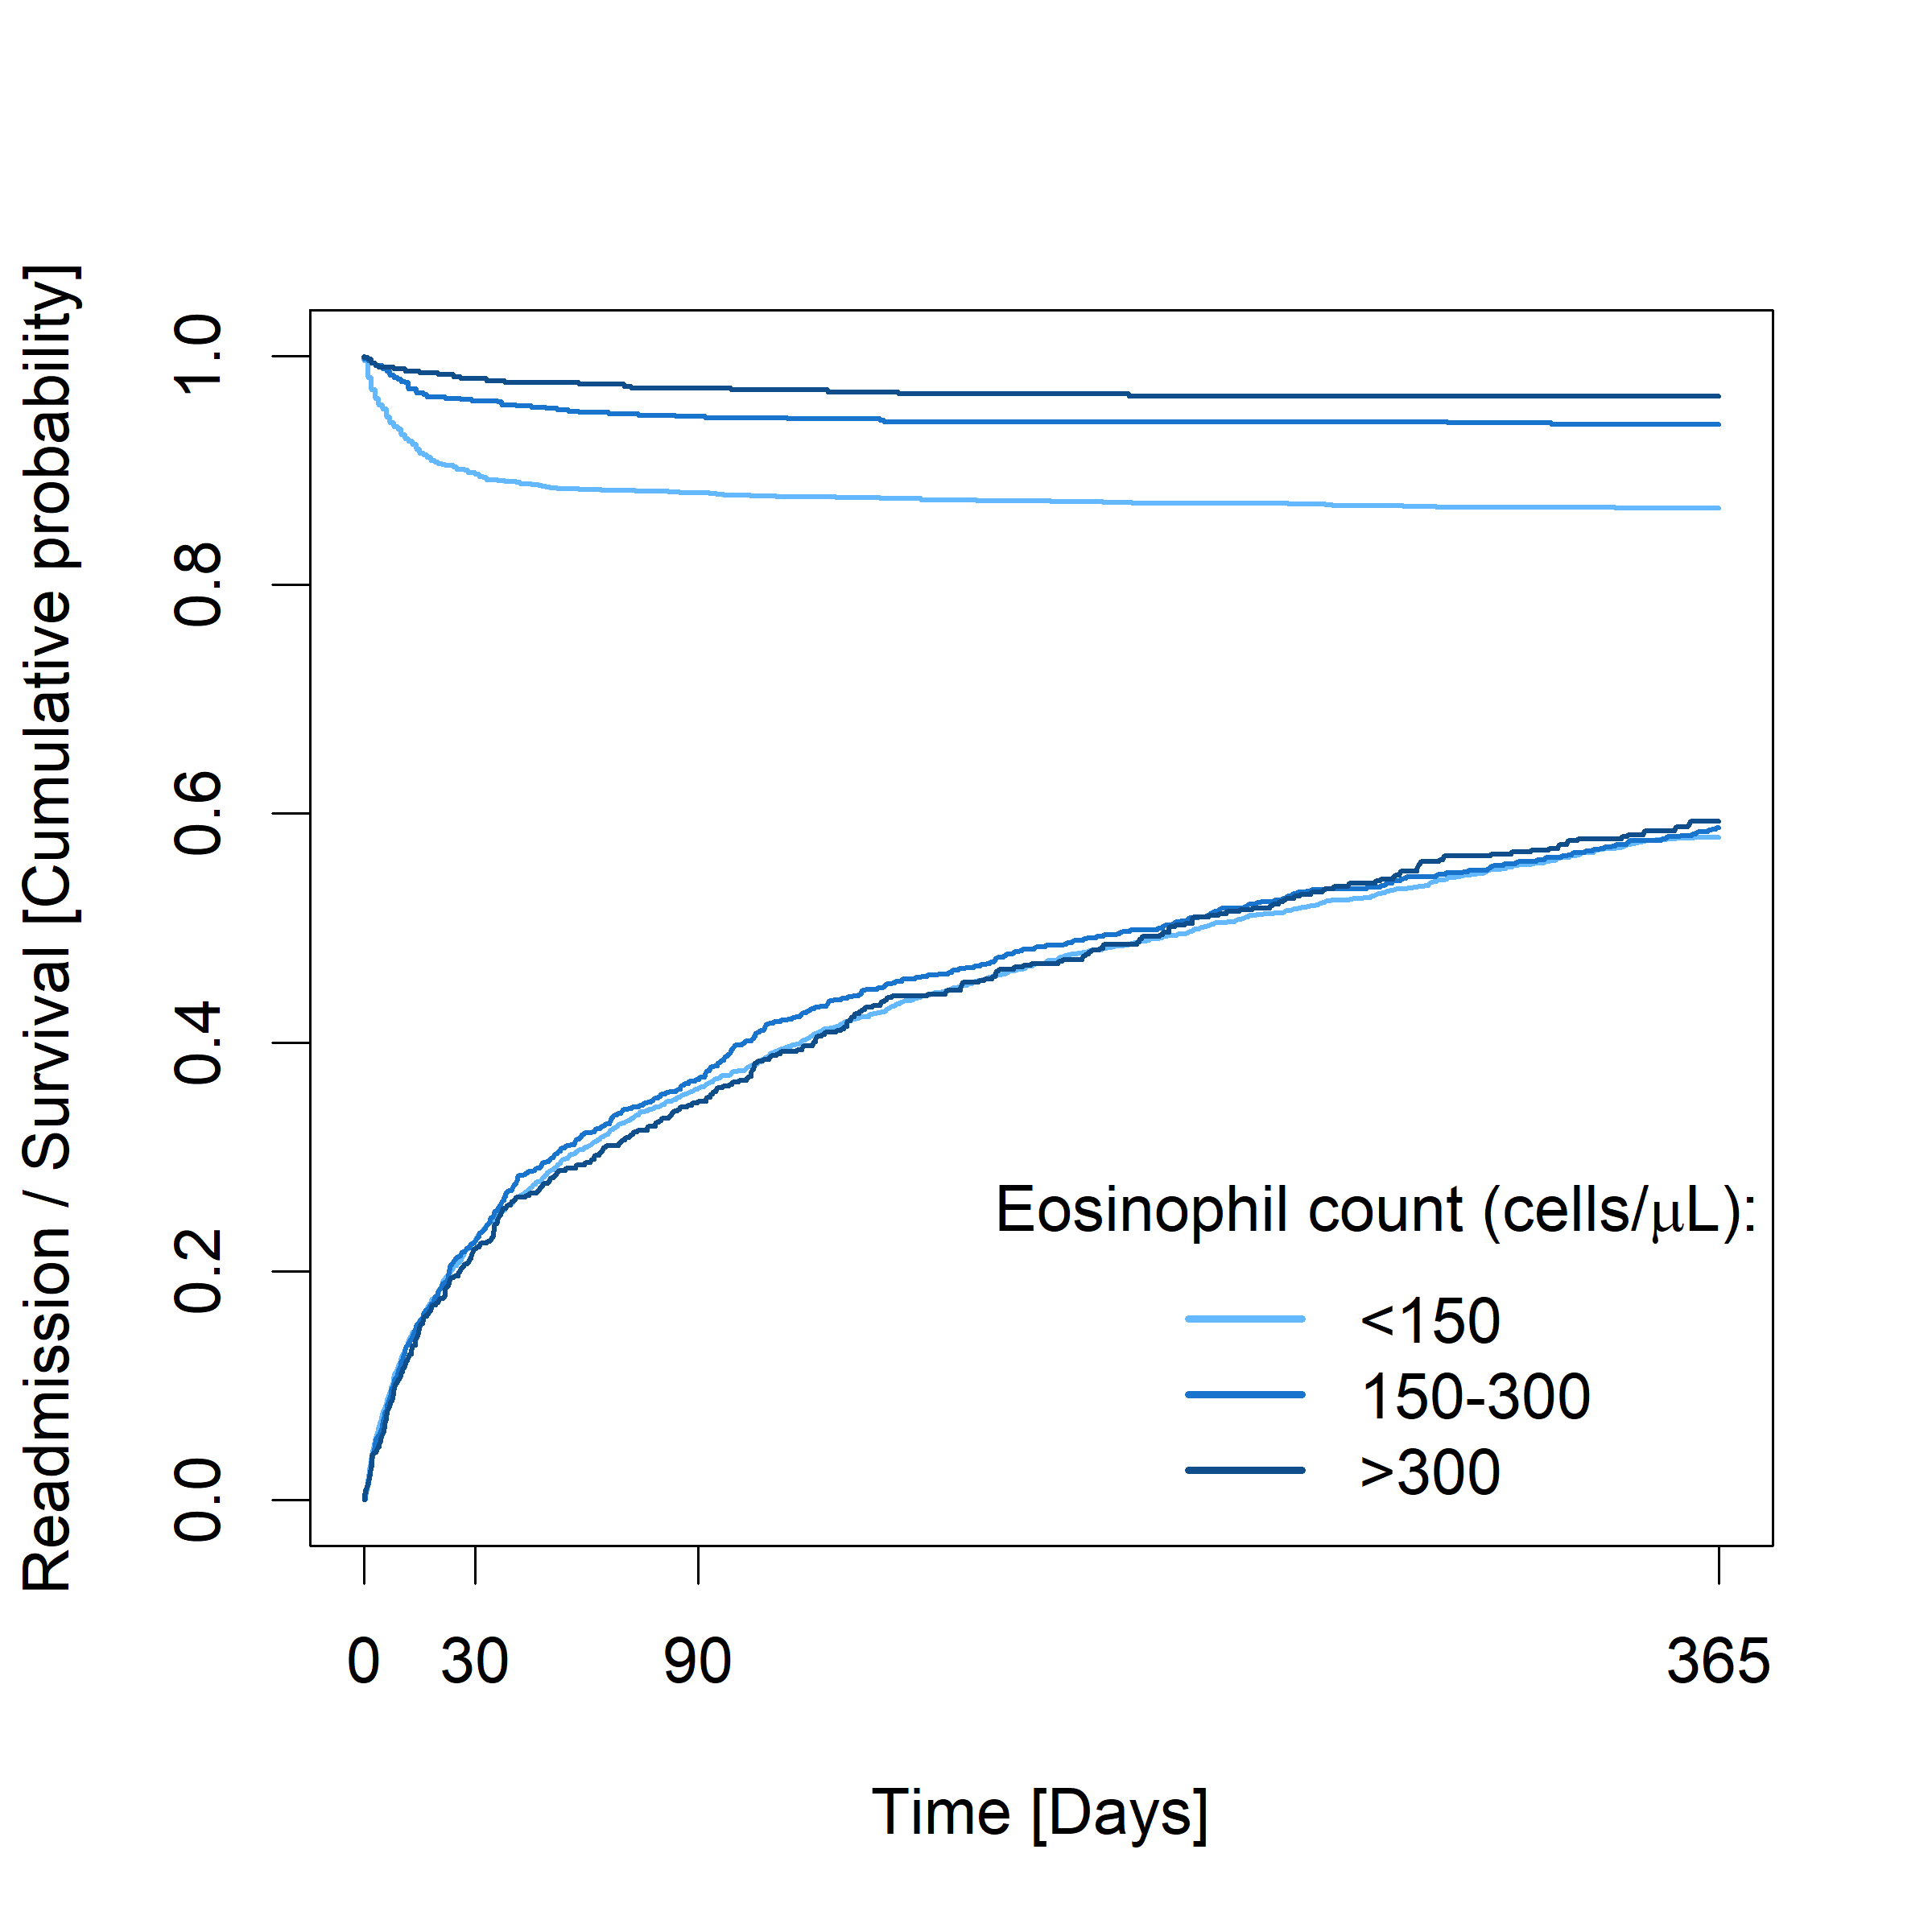


Cumulative incidence plot of mortality (top) and readmission (bottom) within 365 days, stratified by blood eosinophil count, for 4,022 patients acutely admitted with chronic obstructive pulmonary disease.

| **Supplementary Table 1:** HRs for readmission and mortality within 30- or 90-days following hospitalization in patients with COPD (n=4,022), for continuous suPAR (log2-transformed) or stratified by suPAR quartiles. | | | | | | |
| --- | --- | --- | --- | --- | --- | --- |
|  | **Respiratory Readmission** | | **All-cause Readmission** | | **Mortality** | |
|  | HR (95% CI) | P-value | HR (95% CI) | P-value | HR (95% CI) | P-value |
| **30-day follow-up** | | | | | | |
| **Unadjusted** |  |  |  |  |  |  |
| Continuous suPAR | 1.11 (0.97–1.27) | 0.12 | 1.28 (1.18–1.40) | <0.0001 | 2.55 (2.27–2.88) | <0.0001 |
| 1st suPAR quartile† | 1 |  | 1 |  | 1 |  |
| 2nd suPAR quartile | 1.01 (0.76–1.32) | 0.97 | 1.13 (0.92–1.37) | 0.24 | 1.95 (1.25–3.06) | 0.0033 |
| 3rd suPAR quartile | 1.18 (0.90–1.54) | 0.23 | 1.43 (1.18–1.73) | 0.0002 | 3.07 (2.02–4.67) | <0.0001 |
| 4th suPAR quartile | 1.21 (0.93–1.59) | 0.16 | 1.56 (1.29–1.88) | <0.0001 | 7.49 (5.08–11.05) | <0.0001 |
| **Multivariable*** | | | | | | |
| Continuous suPAR | 1.01 (0.86–1.18) | 0.89 | 1.27 (1.15–1.41) | <0.0001 | 2.04 (1.72–2.43) | <0.0001 |
| 1st suPAR quartile† | 1 |  | 1 |  | 1 |  |
| 2nd suPAR quartile | 0.96 (0.71–1.30) | 0.78 | 1.12 (0.89–1.39) | 0.33 | 1.89 (1.10–3.24) | 0.022 |
| 3rd suPAR quartile | 1.02 (0.75–1.38) | 0.91 | 1.41 (1.14–1.75) | 0.0018 | 2.08 (1.23–3.52) | 0.0063 |
| 4th suPAR quartile | 0.99 (0.72–1.37) | 0.97 | 1.54 (1.24–1.93) | 0.0001 | 4.06 (2.46–6.71) | <0.0001 |
| **90-days follow-up** |  |  |  |  |  |  |
| **Unadjusted** |  |  |  |  |  |  |
| Continuous suPAR | 1.11 (1.00–1.23) | 0.051 | 1.29 (1.21–1.39) | <0.0001 | 2.45 (2.23–2.70) | <0.0001 |
| 1st suPAR quartile† | 1 |  | 1 |  | 1 |  |
| 2nd suPAR quartile | 0.97 (0.79–1.21) | 0.81 | 1.09 (0.93–1.28) | 0.27 | 1.94 (1.36–2.76) | 0.0002 |
| 3rd suPAR quartile | 1.18 (0.96–1.45) | 0.12 | 1.40 (1.20–1.63) | <0.0001 | 3.26 (2.35–4.53) | <0.0001 |
| 4th suPAR quartile | 1.16 (0.94–1.44) | 0.16 | 1.57 (1.35–1.82) | <0.0001 | 7.26 (5.34–9.87) | <0.0001 |
| **Multivariable** |  |  |  |  |  |  |
| Continuous suPAR | 1.02 (0.91–1.16) | 0.70 | 1.28 (1.17–1.39) | <0.0001 | 2.01 (1.75–2.29) | <0.0001 |
| 1st suPAR quartile† | 1 |  | 1 |  | 1 |  |
| 2nd suPAR quartile | 0.88 (0.69–1.12) | 0.29 | 1.08 (0.91–1.28) | 0.40 | 1.86 (1.21–2.87) | 0.0050 |
| 3rd suPAR quartile | 1.06 (0.84–1.34) | 0.62 | 1.38 (1.16–1.63) | 0.0003 | 2.54 (1.68–3.83) | <0.0001 |
| 4th suPAR quartile | 0.99 (0.77–1.27) | 0.91 | 1.54 (1.29–1.83) | <0.0001 | 4.57 (3.07–6.79) | <0.0001 |
| *Adjusted for age, sex, Charlson score, suPAR, blood eosinophil count, and C-reactive protein.  †Cut-offs for the suPAR quartiles: Q1: <2.9 ng/ml (n=980, 24.4%), Q2: 2.9–3.8 ng/ml (n=1,003, 24.9%), Q3: 3.9–5.5 ng/ml (n=1,014, 25.2%), Q4: ≥5.6 ng/ml (n=1,025, 25.5%).  CI – Confidence interval  COPD – Chronic obstructive pulmonary disease  HR –Hazard ratio  suPAR – Soluble urokinase plasminogen activator receptor | | | | | | |

| **Supplementary Table 2:** HRs for readmission and mortality within 30- or 90-days following hospitalization in patients with COPD (n=3,849), for continuous blood eosinophil count (log2-transformed) or stratified by low, intermediate, and high blood eosinophil count. | | | | | | |
| --- | --- | --- | --- | --- | --- | --- |
|  | **Respiratory Readmission** | | **All-cause Readmission** | | **Mortality** | |
|  | HR (95% CI) | P-value | HR (95% CI) | P-value | HR (95% CI) | P-value |
| **30-day follow-up** | | | | | | |
| **Unadjusted** |  |  |  |  |  |  |
| Continuous | 1.00 (0.94–1.06) | 0.99 | 0.97 (0.93–1.01) | 0.16 | 0.75 (0.70–0.80) | <0.0001 |
| Low‡ | 1 |  | 1 |  | 1 |  |
| Intermediate | 1.04 (0.82–1.31) | 0.74 | 0.96 (0.81–1.12) | 0.58 | 0.39 (0.29–0.54) | <0.0001 |
| High | 1.00 (0.76–1.32) | 0.98 | 0.90 (0.74–1.09) | 0.26 | 0.23 (0.14–0.37) | <0.0001 |
| **Multivariable*** | | | | | | |
| Continuous | 1.02 (0.95–1.09) | 0.61 | 0.98 (0.94–1.02) | 0.33 | 0.80 (0.74–0.86) | <0.0001 |
| Low‡ | 1 |  | 1 |  | 1 |  |
| Intermediate | 1.06 (0.83–1.35) | 0.65 | 0.95 (0.81–1.13) | 0.57 | 0.48 (0.35–0.66) | <0.0001 |
| High | 1.07 (0.81–1.41) | 0.65 | 0.91 (0.75–1.11) | 0.34 | 0.33 (0.20–0.54) | <0.0001 |
| **90-days follow-up** |  |  |  |  |  |  |
| **Unadjusted** |  |  |  |  |  |  |
| Continuous | 1.00 (0.96–1.05) | 0.91 | 0.97 (0.94–1.00) | 0.081 | 0.79 (0.75–0.84) | <0.0001 |
| Low‡ | 1 |  | 1 |  | 1 |  |
| Intermediate | 0.95 (0.79–1.14) | 0.58 | 0.96 (0.84–1.10) | 0.56 | 0.48 (0.38–0.60) | <0.0001 |
| High | 1.10 (0.90–1.35) | 0.35 | 0.89 (0.77–1.04) | 0.15 | 0.29 (0.21–0.41) | <0.0001 |
| **Multivariable** |  |  |  |  |  |  |
| Continuous | 1.03 (0.98–1.08) | 0.31 | 0.98 (0.95–1.01) | 0.24 | 0.83 (0.79–0.88) | <0.0001 |
| Low‡ | 1 |  | 1 |  | 1 |  |
| Intermediate | 0.98 (0.81–1.19) | 0.86 | 0.96 (0.84–1.10) | 0.55 | 0.54 (0.43–0.69) | <0.0001 |
| High | 1.19 (0.96–1.47) | 0.11 | 0.90 (0.77–1.05) | 0.19 | 0.39 (0.27–0.55) | <0.0001 |
| *Adjusted for age, sex, Charlson score, suPAR, blood eosinophil count, and C-reactive protein.  †Cut-offs for the suPAR quartiles: Q1: <2.9 ng/ml (n=980, 24.4%), Q2: 2.9–3.8 ng/ml (n=1,003, 24.9%), Q3: 3.9–5.5 ng/ml (n=1,014, 25.2%), Q4: ≥5.6 ng/ml (n=1,025, 25.5%).  CI – Confidence interval  COPD – Chronic obstructive pulmonary disease  HR –Hazard ratio  suPAR – Soluble urokinase plasminogen activator receptor | | | | | | |
